# Supplementary material for: Dynamic prediction of mortality after traumatic brain injury using a machine learning algorithm
Source: PubMed Central journal article supplement (PMC9293936; doi:10.1038/s41746-022-00652-3), 2022-07-18

# Supplementary Information

## Table of Contents

|                                                                                                                                              |    |
|----------------------------------------------------------------------------------------------------------------------------------------------|----|
| Supplementary Table 1: Patient characteristics in the training cohort according to hospital.....                                             | 2  |
| Supplementary Table 2: All considered features .....                                                                                         | 4  |
| Supplementary Table 3: Included features and regression coefficients .....                                                                   | 5  |
| Supplementary Figure 1: Difference in the mean level of intracranial pressure between 30-day survivors and non-survivors in the cohorts..... | 7  |
| Supplementary Figure 2: Recursive feature elimination.....                                                                                   | 8  |
| Supplementary Figure 3: Feature correlation matrix .....                                                                                     | 9  |
| Supplementary Figure 4: The rate of false positives and false negatives in the training cohort.....                                          | 10 |
| Supplementary Figure 5: Threshold testing in the Stockholm cohort.....                                                                       | 11 |
| Supplementary Figure 6: Threshold testing in the eICU cohort.....                                                                            | 12 |

**Supplementary Table 1: Patient characteristics in the training cohort according to hospital**

| Variable                                  | Helsinki UH<br>(n=248) | Kuopio UH<br>(n=123) | Tampere UH<br>(n=155) | Turku UH<br>(n=160) |
|-------------------------------------------|------------------------|----------------------|-----------------------|---------------------|
| <b>Age, median (IQR)</b>                  | 44 (27, 57)            | 55 (41, 63)          | 39 (23, 59)           | 44 (27, 61)         |
| <b>Female sex</b>                         | 55 (22%)               | 21 (17%)             | 31 (20%)              | 28 (18%)            |
| <b>Admission GCS score</b>                |                        |                      |                       |                     |
| 3 to 8                                    | 187 (75%)              | 87 (71%)             | 96 (62%)              | 95 (59%)            |
| 9 to 12                                   | 53 (22%)               | 21 (17%)             | 38 (25%)              | 45 (28%)            |
| 13 to 15                                  | 8 (3%)                 | 15 (12%)             | 21 (13%)              | 20 (13%)            |
| <b>Admission motor score</b>              |                        |                      |                       |                     |
| None                                      | 91 (37%)               | 28 (23%)             | 38 (25%)              | 29 (18%)            |
| Extension                                 | 8 (3%)                 | 9 (7%)               | 9 (6%)                | 8 (5%)              |
| Abnormal flexion                          | 10 (4%)                | 7 (6%)               | 4 (2%)                | 14 (9%)             |
| Normal flexion                            | 35 (14%)               | 31 (25%)             | 31 (20%)              | 27 (17%)            |
| Localizes/obeys                           | 104 (42%)              | 48 (39%)             | 73 (47%)              | 82 (51%)            |
| <b>Pupillary light reactivity</b>         |                        |                      |                       |                     |
| None react                                | 19 (8%)                | 5 (4%)               | 2 (1%)                | 6 (4%)              |
| One reacts                                | 46 (18%)               | 18 (15%)             | 17 (11%)              | 19 (12%)            |
| Both react                                | 183 (74%)              | 100 (81%)            | 136 (88%)             | 135 (84%)           |
| <b>Hypoxia</b>                            | 52 (21%)               | 23 (19%)             | 15 (10%)              | 20 (13%)            |
| <b>Hypotension</b>                        | 39 (16%)               | 12 (10%)             | 9 (6%)                | 14 (9%)             |
| <b>Marshall CT class</b>                  |                        |                      |                       |                     |
| DI I                                      | 0 (0%)                 | 4 (3%)               | 3 (2%)                | 5 (3%)              |
| DI II                                     | 67 (27%)               | 23 (19%)             | 104 (66%)             | 66 (41%)            |
| DI III                                    | 51 (21%)               | 22 (18%)             | 23 (15%)              | 25 (16%)            |
| DI IV                                     | 11 (4%)                | 4 (3%)               | 4 (3%)                | 6 (4%)              |
| EML/NEML                                  | 111 (48%)              | 70 (57%)             | 21 (14%)              | 58 (36%)            |
| <b>Traumatic SAH</b>                      | 204 (82%)              | 65 (53%)             | 107 (69%)             | 115 (72%)           |
| <b>Epidural hematoma</b>                  | 24 (10%)               | 11 (9%)              | 5 (3%)                | 17 (11%)            |
| <b>Craniotomy and hematoma evacuation</b> | 109 (44%)              | 77 (63%)             | 31 (20%)              | 56 (35%)            |

|                                                                                                                                                                                                                                                                                                                                                                                                                    |            |          |            |           |
|--------------------------------------------------------------------------------------------------------------------------------------------------------------------------------------------------------------------------------------------------------------------------------------------------------------------------------------------------------------------------------------------------------------------|------------|----------|------------|-----------|
| <b>Decompressive craniectomy</b>                                                                                                                                                                                                                                                                                                                                                                                   | 38 (15%)   | 19 (15%) | 34 (22%)   | 22 (14%)  |
| Primary                                                                                                                                                                                                                                                                                                                                                                                                            | 20 (8%)    | 8 (6%)   | 16 (10%)   | 4 (3%)    |
| Secondary                                                                                                                                                                                                                                                                                                                                                                                                          | 18 (7%)    | 11 (9%)  | 18 (12%)   | 18 (11%)  |
| <b>External ventricular drain</b>                                                                                                                                                                                                                                                                                                                                                                                  | 37 (15%)   | 55 (45%) | 11 (7%)    | 11 (7%)   |
| <b>ICU length of stay</b> (days),<br>median (IQR)                                                                                                                                                                                                                                                                                                                                                                  | 10 (5, 14) | 4 (3-8)  | 10 (6, 16) | 9 (5, 16) |
| <b>30-day mortality</b>                                                                                                                                                                                                                                                                                                                                                                                            | 37 (15%)   | 26 (21%) | 18 (12%)   | 39 (24%)  |
| <p>Hypoxia defined as any prehospital spO2 value &lt;90%</p> <p>Hypotension defined as any prehospital systolic blood pressure value &lt;90 mmHg</p> <p>Abbreviations: CT=Computer Tomography, DI=Diffuse Injury, EML=Evacuated Mass Lesion (&gt;25 cm<sup>3</sup>),<br/> NEML=Non-Evacuated Mass Lesion (&gt;25 cm<sup>3</sup>), GCS=Glasgow Coma Scale, IQR=Interquartile Range,<br/> UH=University Hospital</p> |            |          |            |           |

## Supplementary Table 2: All considered features

1. agec
2. icp\_begin
3. icp\_end
4. icp\_coef
5. icp\_q90\_begin
6. icp\_q90\_end
7. icp\_q90\_coef
8. cpp\_var\_begin
9. cpp\_var\_end
10. cpp\_var\_coef
11. map\_begin
12. map\_end
13. map\_coef
14. map\_q90\_begin
15. map\_q90\_end
16. map\_q90\_coef
17. map\_q10\_begin
18. map\_q10\_end
19. map\_q10\_coef
20. map\_diff\_begin
21. map\_diff\_end
22. map\_diff\_coef
23. cpp\_diff\_begin
24. cpp\_diff\_end
25. cpp\_diff\_coef
26. icp\_ht20\_begin
27. icp\_ht20\_end
28. icp\_ht20\_coef
29. icp\_var\_begin
30. icp\_var\_end
31. icp\_var\_coef
32. map\_ht120\_begin
33. map\_ht120\_end
34. map\_ht120\_coef
35. map\_var\_begin
36. map\_var\_end
37. map\_var\_coef
38. cpp\_begin
39. cpp\_end
40. cpp\_coef
41. icp\_diff\_begin
42. icp\_diff\_end
43. icp\_diff\_coef
44. icp\_lt10\_begin
45. icp\_lt10\_end
46. icp\_lt10\_coef
47. cpp\_q10\_begin
48. cpp\_q10\_end
49. cpp\_q10\_coef
50. icp\_q10\_begin
51. icp\_q10\_end
52. icp\_q10\_coef
53. cpp\_q90\_begin
54. cpp\_q90\_end
55. cpp\_q90\_coef

### Abbreviations:

- agec = age category (20, 20-29, 30-39, 40-49, 50-59, 60-69, 70-79, 80-89, 90-99 years)
- icp = intracranial pressure
- cpp = cerebral perfusion pressure
- map = mean arterial pressure
- mr = motor response
- er = eye response
- begin = mean value from the first derived 24-hour time-window
- end = mean value from the last derived 8 hours
- coef = slope of the linear coefficient from the start of the derived time-window up to the time of the prediction
- min = minimum value in the derived time-window
- max = maximum value in the derived time-window
- diff = mean of differences between consequent values in the derived time-window
- var = variance in the derived time-window
- avg = mean value in the derived time-window
- q90 = 90th percentile in the derived time-window
- q10 = 10th percentile in the derived time-window
- ht20 = percentage of measurement points being higher than 20 mmHg in the derived time-window
- ht120 = percentage of measurement points being higher than 120 mmHg in the derived time-window
- lt10 = percentage of measurement points being lower than 10 mmHg in the derived time-window

**Supplementary Table 3: Included features and regression coefficients**

| Feature abbreviation                                                                                                                                                                                                                                                                                                                                                                                                                                                                                                                                                                                                                                                                                                                                                                                                                                                                          | Coefficient (SD) |
|-----------------------------------------------------------------------------------------------------------------------------------------------------------------------------------------------------------------------------------------------------------------------------------------------------------------------------------------------------------------------------------------------------------------------------------------------------------------------------------------------------------------------------------------------------------------------------------------------------------------------------------------------------------------------------------------------------------------------------------------------------------------------------------------------------------------------------------------------------------------------------------------------|------------------|
| agec                                                                                                                                                                                                                                                                                                                                                                                                                                                                                                                                                                                                                                                                                                                                                                                                                                                                                          | 0.96 (0.14)      |
| cpp_diff_begin                                                                                                                                                                                                                                                                                                                                                                                                                                                                                                                                                                                                                                                                                                                                                                                                                                                                                | -0.95 (0.41)     |
| cpp_diff_coef                                                                                                                                                                                                                                                                                                                                                                                                                                                                                                                                                                                                                                                                                                                                                                                                                                                                                 | 1.42 (0.83)      |
| cpp_end                                                                                                                                                                                                                                                                                                                                                                                                                                                                                                                                                                                                                                                                                                                                                                                                                                                                                       | 0.38 (0.15)      |
| cpp_var_coef                                                                                                                                                                                                                                                                                                                                                                                                                                                                                                                                                                                                                                                                                                                                                                                                                                                                                  | -1.12 (0.62)     |
| icp_coef                                                                                                                                                                                                                                                                                                                                                                                                                                                                                                                                                                                                                                                                                                                                                                                                                                                                                      | 0.83 (0.66)      |
| icp_diff_coef                                                                                                                                                                                                                                                                                                                                                                                                                                                                                                                                                                                                                                                                                                                                                                                                                                                                                 | -0.77 (0.41)     |
| icp_diff_end                                                                                                                                                                                                                                                                                                                                                                                                                                                                                                                                                                                                                                                                                                                                                                                                                                                                                  | -0.41 (0.33)     |
| icp_end                                                                                                                                                                                                                                                                                                                                                                                                                                                                                                                                                                                                                                                                                                                                                                                                                                                                                       | 1.13 (0.22)      |
| icp_q90_coef                                                                                                                                                                                                                                                                                                                                                                                                                                                                                                                                                                                                                                                                                                                                                                                                                                                                                  | -1.00 (0.66)     |
| icp_var_coef                                                                                                                                                                                                                                                                                                                                                                                                                                                                                                                                                                                                                                                                                                                                                                                                                                                                                  | 0.57 (0.36)      |
| map_diff_begin                                                                                                                                                                                                                                                                                                                                                                                                                                                                                                                                                                                                                                                                                                                                                                                                                                                                                | 0.60 (0.40)      |
| map_diff_coef                                                                                                                                                                                                                                                                                                                                                                                                                                                                                                                                                                                                                                                                                                                                                                                                                                                                                 | -1.78 (0.81)     |
| map_var_coef                                                                                                                                                                                                                                                                                                                                                                                                                                                                                                                                                                                                                                                                                                                                                                                                                                                                                  | 1.65 (0.61)      |
| <p>A positive coefficient value indicates that a higher feature value increases the risk of 30-day mortality and a negative coefficient value indicates that a higher feature value decreases the risk of 30-day mortality.</p> <p><i>Abbreviations:</i><br/> agec=age categories in deciles<br/> cpp=cerebral perfusion pressure,<br/> map=mean arterial pressure,<br/> icp=intracranial pressure,<br/> end = mean value from the last derived 8 hours,<br/> diff=mean of differences between consequent values in the derived time-window,<br/> begin=mean value from the first derived 24-hour time-window,<br/> end=mean value from the last derived 8 hours,<br/> coef=slope of the linear coefficient from the start of the derived time-window up to the time of the prediction,<br/> var=variance in the derived time-window,<br/> q90=90th percentile in the derived time-window</p> |                  |

**Supplementary Table 4:** Included Acute Physiology and Chronic Health Evaluation (APACHE) diagnoses from the eICU database

|                                                                              |
|------------------------------------------------------------------------------|
| Hematoma subdural, surgery for                                               |
| Head only trauma                                                             |
| Hematoma-epidural, surgery for                                               |
| Head/chest trauma                                                            |
| Head/multiple trauma                                                         |
| Head/spinal trauma                                                           |
| Head/extremity trauma                                                        |
| Head/face trauma                                                             |
| Head/abdomen trauma                                                          |
| Head/pelvis trauma                                                           |
| <i>Abbreviations: APACHE, Acute Physiology and Chronic Health Evaluation</i> |

### Supplementary Figure 1: Difference in the mean level of intracranial pressure between 30-day survivors and non-survivors in the cohorts

At the top the training cohort, in the middle the Stockholm cohort and at the bottom the eICU cohort. Means calculated in 12 h windows. Shown with 1 standard deviation.

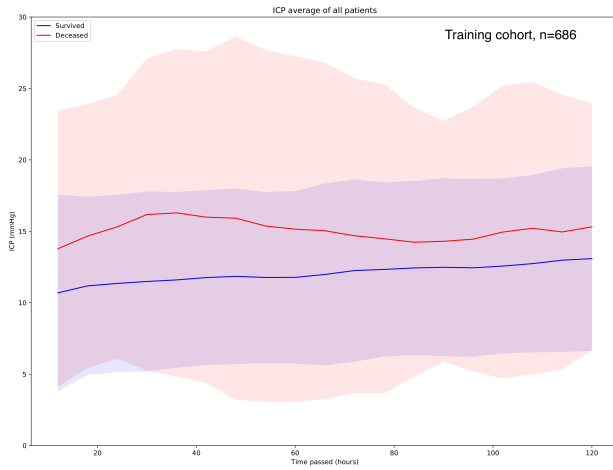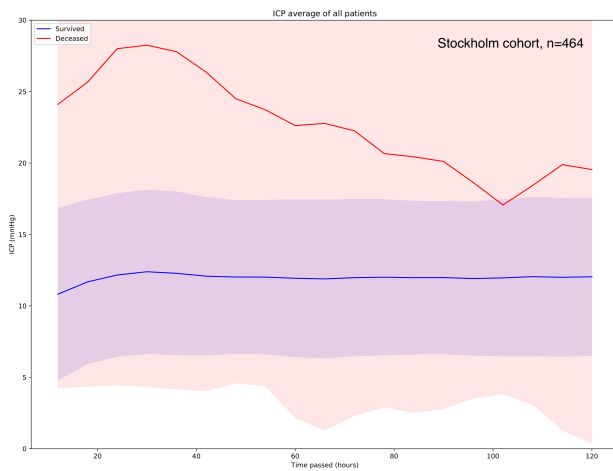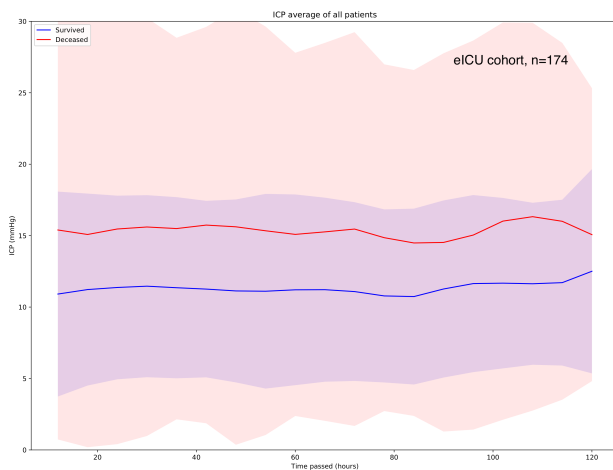

## Supplementary Figure 2: Recursive feature elimination.

When retraining the algorithm, the recursive feature elimination gave an optimal of 14 features to be included.

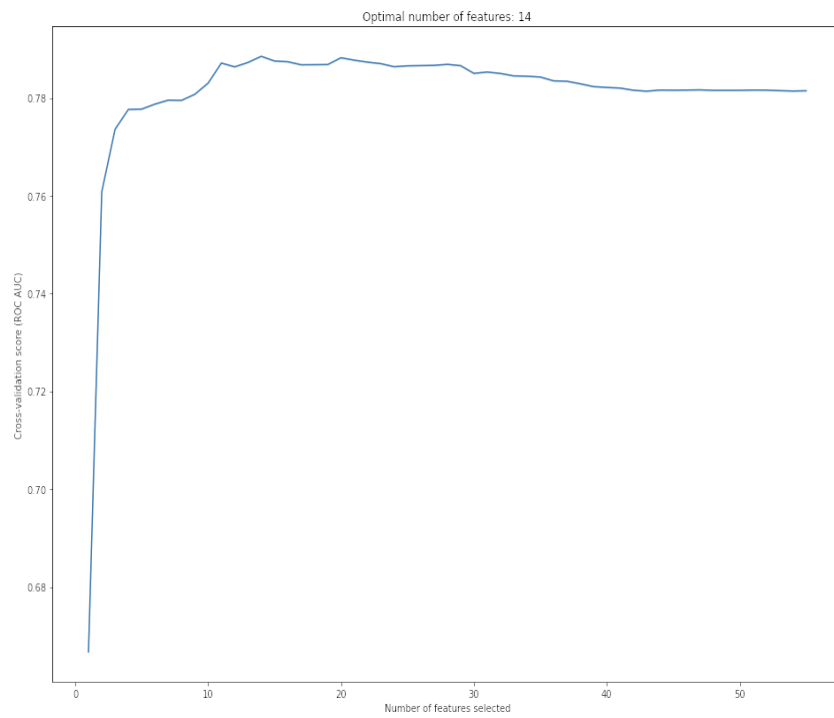



### Supplementary Figure 3: Feature correlation matrix

Correlation matrix between included features when retraining the algorithm. Y-axis features in descending order: agec, icp\_end, icp\_coef, cpp\_end, icp\_var\_coef, map\_var\_coef, cpp\_var\_coef, icp\_diff\_end, icp\_diff\_coef, map\_diff\_begin, map\_diff\_coef, cpp\_diff\_begin, cpp\_diff\_coef, icp\_q90\_coef

X-axis features from left to right: agec, icp\_end, icp\_coef, cpp\_end, icp\_var\_coef, map\_var\_coef, cpp\_var\_coef, icp\_diff\_end, icp\_diff\_coef, map\_diff\_begin, map\_diff\_coef, cpp\_diff\_begin, cpp\_diff\_coef, icp\_q90\_coef

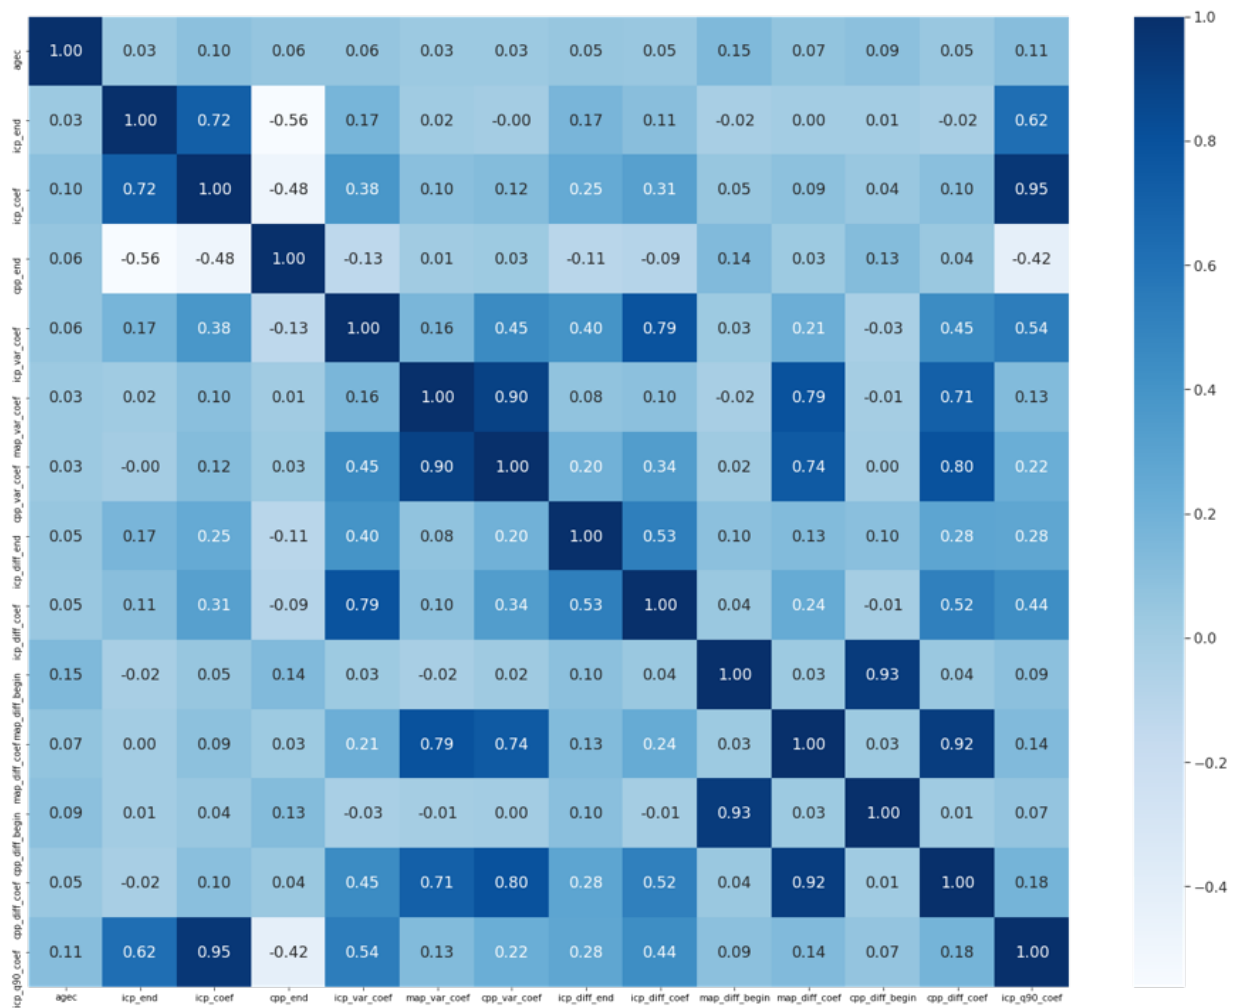

**Supplementary Figure 4:** The rate of false positives and false negatives in the training cohort.

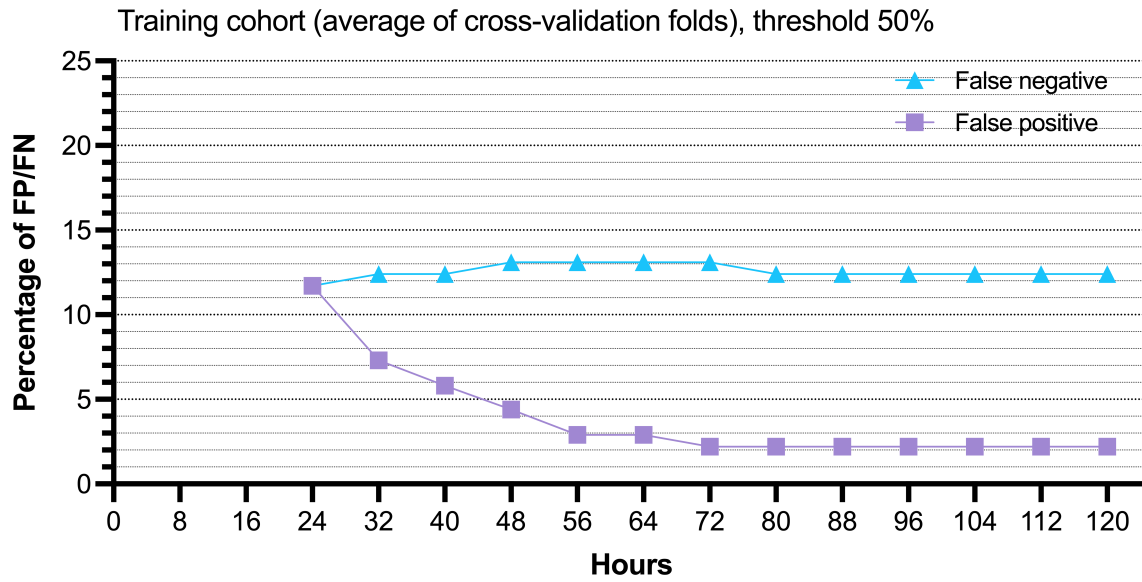

### Supplementary Figure 5: Threshold testing in the Stockholm cohort.

Decreasing the prediction threshold from 50% to 25% increased the number of false positives but decreased the number of false negatives. Conversely, increasing the prediction threshold from 50% to 75% decreased the number of false positives but increased the number of false negatives.

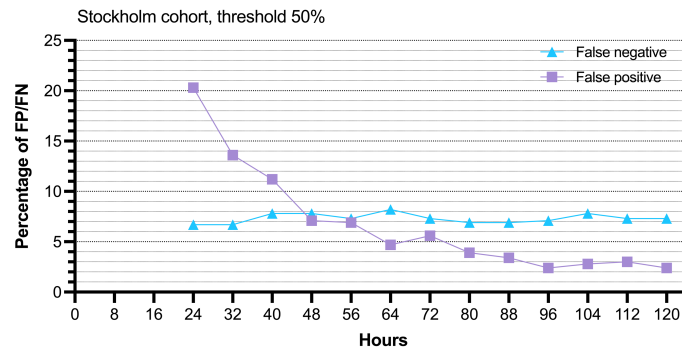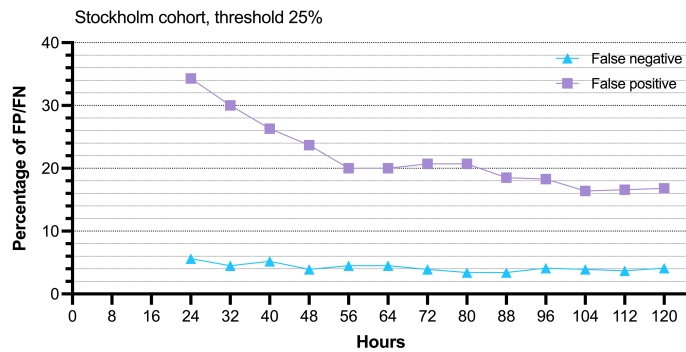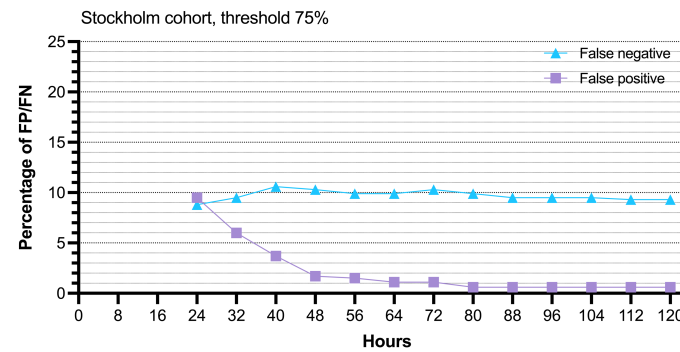

### Supplementary Figure 6: Threshold testing in the eICU cohort.

Decreasing the prediction threshold from 50% to 25% increased the number of false positives but decreased the number of false negatives. Conversely, increasing the prediction threshold from 50% to 75% decreased the number of false positives but increased the number of false negatives.

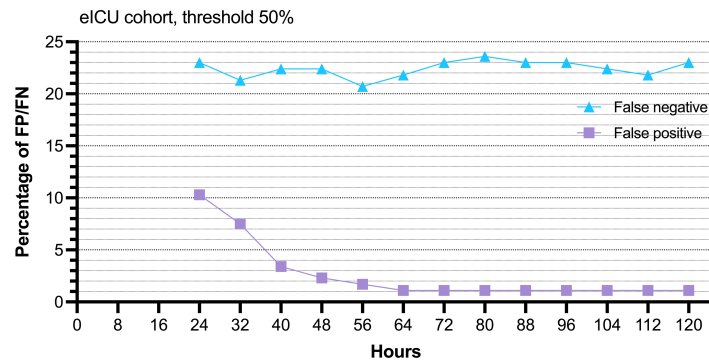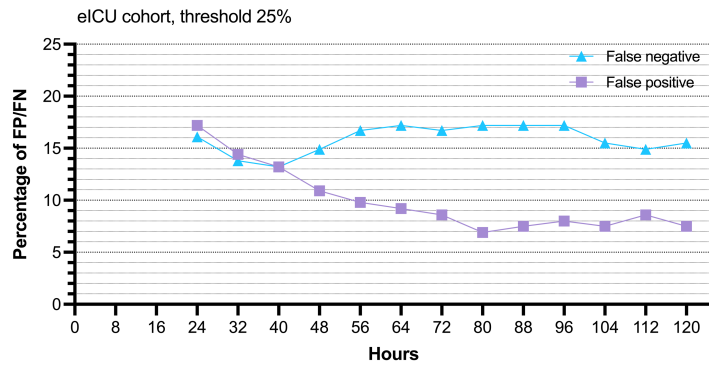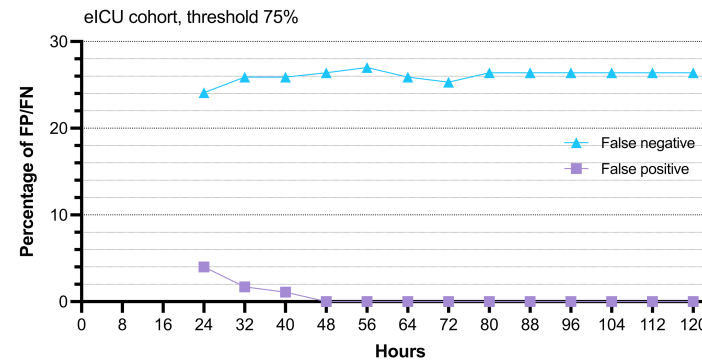

Supplement: 41746_2022_652_MOESM2_ESM.pdf [file 41746_2022_652_MOESM2_ESM.pdf]
